# Supplementary material for: Alterations of miRNA Expression in Diffuse Hyperplastic Perilobar Nephroblastomatosis: Mapping the Way to Understanding Wilms’ Tumor Development and Differential Diagnosis
Source: MDPI journal article supplement (doi:10.3390/ijms24108793), 2023-05-15
Supplement: s1 [file s1]

**Table S1.** Log<sub>2</sub>FC values of DHPLN samples from four patients (1-4).

| miRNA           | Patient 1 | Patient 2 | Patient 3 | Patient 4 | Mean  |
|-----------------|-----------|-----------|-----------|-----------|-------|
| hsa-let-7a-5p   | 0.21      | -0.35     | -0.39     | 0.23      | -0.08 |
| hsa-let-7b-5p   | 0.34      | -0.30     | 0.14      | 0.56      | 0.18  |
| hsa-let-7c-5p   | 0.03      | -0.43     | -0.26     | -0.15     | -0.20 |
| hsa-let-7f-5p   | 0.07      | -0.10     | -1.36     | -0.24     | -0.41 |
| hsa-miR-100-5p  | -0.87     | -0.87     | 0.25      | -0.22     | -0.43 |
| hsa-miR-101-3p  | -0.13     | -0.53     | -2.39     | -2.72     | -1.44 |
| hsa-miR-106b-5p | 2.26      | 0.14      | -0.46     | -2.49     | -0.14 |
| hsa-miR-125a-5p | 0.53      | -0.77     | -0.77     | 1.09      | 0.02  |
| hsa-miR-125b-5p | -1.48     | -0.87     | -0.17     | -0.25     | -0.69 |
| hsa-miR-126-3p  | -1.26     | -3.24     | -3.17     | -1.62     | -2.32 |
| hsa-miR-126-5p  | -1.75     | -3.49     | -1.89     | -0.69     | -1.96 |
| hsa-miR-128-3p  | 2.31      | 0.29      | -1.41     | -1.11     | 0.02  |
| hsa-miR-133a-3p | -4.50     | -1.73     | -3.71     | -0.30     | -2.56 |
| hsa-miR-135a-5p | 1.92      | 0.41      | 3.09      | 0.42      | 1.46  |
| hsa-miR-135b-5p | 3.58      | -0.49     | 5.06      | 0.67      | 2.20  |
| hsa-miR-141-3p  | -3.93     | -4.89     | -7.53     | -5.69     | -5.51 |
| hsa-miR-143-3p  | -2.49     | -0.93     | -0.86     | -3.03     | -1.83 |
| hsa-miR-145-5p  | -2.62     | -1.79     | -1.51     | -1.92     | -1.96 |
| hsa-miR-146a-5p | -0.46     | -0.20     | -0.79     | 0.92      | -0.13 |
| hsa-miR-146b-5p | 1.86      | -0.83     | -0.16     | 1.68      | 0.64  |
| hsa-miR-148a-3p | -0.14     | 0.25      | -2.24     | -2.53     | -1.17 |
| hsa-miR-15a-5p  | -0.55     | -0.40     | -1.58     | -2.27     | -1.20 |
| hsa-miR-15b-5p  | 1.42      | 0.45      | -1.15     | -1.76     | -0.26 |
| hsa-miR-16-5p   | 0.34      | -1.23     | -2.12     | -0.94     | -0.99 |
| hsa-miR-17-5p   | 2.42      | -0.55     | -1.17     | -1.53     | -0.21 |
| hsa-miR-17-3p   | 1.88      | -0.38     | -1.61     | -1.33     | -0.36 |
| hsa-miR-181a-5p | 1.58      | 1.12      | 2.04      | 0.98      | 1.43  |
| hsa-miR-181b-5p | 1.80      | 0.86      | 1.69      | 2.15      | 1.62  |
| hsa-miR-182-5p  | 2.78      | -3.64     | -6.14     | 0.56      | -1.61 |
| hsa-miR-183-5p  | 2.08      | -2.88     | -4.88     | 0.63      | -1.26 |
| hsa-miR-184     | -2.71     | -4.85     | -6.93     | -4.47     | -4.74 |
| hsa-miR-194-5p  | -2.35     | -5.07     | -7.71     | -5.04     | -5.04 |
| hsa-miR-195-5p  | 0.43      | 0.00      | -2.84     | -1.46     | -0.97 |
| hsa-miR-196a-5p | 2.39      | -0.69     | -1.04     | 1.03      | 0.42  |
| hsa-miR-19b-3p  | 1.70      | -0.61     | -1.78     | -3.51     | -1.05 |
| hsa-miR-200b-3p | -3.59     | -2.43     | -11.52    | -1.35     | -4.72 |
| hsa-miR-200c-3p | -3.90     | -3.69     | -7.69     | -1.57     | -4.21 |
| hsa-miR-203a-3p | -3.90     | -4.21     | -5.01     | -3.56     | -4.17 |
| hsa-miR-205-5p  | -1.73     | -0.71     | -1.26     | 1.83      | -0.47 |
| hsa-miR-20a-5p  | 2.08      | -0.56     | -1.30     | -1.24     | -0.26 |
| hsa-miR-20b-5p  | -1.06     | -1.82     | -3.50     | -3.53     | -2.48 |
| hsa-miR-21-5p   | -1.10     | -1.49     | -2.32     | 1.02      | -0.97 |
| hsa-miR-218-5p  | 1.45      | -2.58     | -2.73     | -1.14     | -1.25 |
| hsa-miR-22-3p   | -2.16     | -1.96     | -2.34     | -2.98     | -2.36 |
| hsa-miR-221-3p  | 1.47      | -1.61     | -1.47     | -1.25     | -0.72 |
| hsa-miR-222-3p  | 1.05      | -1.45     | -0.84     | -0.65     | -0.47 |
| hsa-miR-223-3p  | -1.00     | -0.90     | -0.72     | 0.37      | -0.56 |
| hsa-miR-224-5p  | -0.05     | -2.81     | -4.14     | 0.95      | -1.51 |
| hsa-miR-23b-3p  | 1.23      | -2.09     | -0.86     | 0.40      | -0.33 |

|                 |       |       |        |       |       |
|-----------------|-------|-------|--------|-------|-------|
| hsa-miR-24-3p   | 0.64  | -0.90 | -1.17  | -0.92 | -0.59 |
| hsa-miR-25-3p   | 2.77  | -0.58 | -1.21  | 0.57  | 0.39  |
| hsa-miR-26a-5p  | -0.17 | -0.79 | -0.81  | 0.20  | -0.39 |
| hsa-miR-26b-5p  | 0.03  | -0.29 | -0.69  | -0.04 | -0.25 |
| hsa-miR-27a-3p  | 0.20  | -1.52 | -0.94  | -0.90 | -0.79 |
| hsa-miR-27b-3p  | 0.62  | -1.40 | -1.07  | -0.90 | -0.69 |
| hsa-miR-296-5p  | 1.37  | 1.45  | 0.01   | 0.19  | 0.75  |
| hsa-miR-29b-3p  | -3.62 | -0.66 | -0.75  | -2.51 | -1.89 |
| hsa-miR-30c-5p  | -0.81 | -2.68 | -1.74  | -1.80 | -1.76 |
| hsa-miR-31-5p   | -0.03 | -1.76 | -1.14  | -3.23 | -1.54 |
| hsa-miR-3163    | -     | -     | -4.16  | -     | -4.16 |
| hsa-miR-32-5p   | -0.48 | -1.12 | -1.55  | -2.06 | -1.30 |
| hsa-miR-330-3p  | 0.70  | -1.37 | -0.52  | -1.20 | -0.60 |
| hsa-miR-331-3p  | -0.09 | -0.92 | -0.16  | -1.70 | -0.72 |
| hsa-miR-34a-5p  | -0.23 | 0.49  | 2.70   | -1.54 | 0.35  |
| hsa-miR-34b-3p  | 0.32  | -     | -      | -0.12 | 0.10  |
| hsa-miR-34c-5p  | -2.17 | -     | -1.60  | -3.07 | -2.28 |
| hsa-miR-361-5p  | 1.15  | -1.15 | -1.66  | 0.45  | -0.30 |
| hsa-miR-365a-3p | -0.58 | -0.79 | -0.41  | -0.31 | -0.52 |
| hsa-miR-3662    | -     | -     | -      | -     | -     |
| hsa-miR-3666    | -     | -     | -      | -     | -     |
| hsa-miR-374b-5p | 1.12  | -0.63 | 0.17   | 0.21  | 0.22  |
| hsa-miR-375     | -0.21 | -1.79 | -10.13 | 1.37  | -2.69 |
| hsa-miR-425-5p  | 0.51  | -     | 0.00   | -0.31 | 0.07  |
| hsa-miR-449a    | 1.24  | -     | -      | -     | 1.24  |
| hsa-miR-455-5p  | -2.41 | -     | -2.44  | -3.28 | -2.71 |
| hsa-miR-494-3p  | 0.67  | -     | -0.64  | -2.68 | -0.88 |
| hsa-miR-616-3p  | -     | -     | -0.96  | 3.05  | 1.04  |
| hsa-miR-7-5p    | -0.06 | 0.12  | 1.36   | -1.41 | 0.00  |
| hsa-miR-9-3p    | -1.50 | -2.85 | 0.12   | -4.26 | -2.12 |
| hsa-miR-92a-3p  | 1.43  | -0.65 | -1.42  | 1.02  | 0.09  |
| hsa-miR-93-5p   | 2.90  | -0.44 | 0.17   | -1.45 | 0.29  |
| hsa-miR-96-5p   | 1.10  | -0.63 | -3.67  | -1.81 | -1.25 |
| hsa-miR-99a-5p  | -2.07 | -2.05 | 0.78   | -1.52 | -1.22 |
| hsa-miR-99b-5p  | 0.86  | -1.81 | 0.42   | 0.42  | -0.03 |

---

**Table S2.** Log<sub>2</sub>FC values from WT samples of various types. Sample sizes are shown in brackets. Includes literature data [14,17–21] and our single WT sample from Patient 1.

| miRNA           | Fresh kidney tissue | Blood      | FFPE       | Weighted average |
|-----------------|---------------------|------------|------------|------------------|
| hsa-let-7a-5p   | -                   | -0.95 (59) | -0.51 (3)  | -0.93            |
| hsa-let-7b-5p   | -                   | -0.94 (59) | -0.62 (3)  | -0.92            |
| hsa-let-7c-5p   | -                   | -1.17 (59) | -0.49 (3)  | -1.14            |
| hsa-let-7f-5p   | -                   | -1.04 (59) | -0.68 (3)  | -1.02            |
| hsa-miR-100-5p  | -                   | -          | -0.13 (3)  | -0.13            |
| hsa-miR-101-3p  | -1.80 (77)          | -1.01 (43) | -0.65 (3)  | -1.50            |
| hsa-miR-106b-5p | 2.22 (77)           | -0.52 (59) | 0.53 (3)   | 1.02             |
| hsa-miR-125a-5p | -                   | -          | 0.00 (3)   | 0.00             |
| hsa-miR-125b-5p | -                   | -          | 0.01 (3)   | 0.01             |
| hsa-miR-126-3p  | -1.60 (77)          | -2.52 (43) | -2.70 (3)  | -1.95            |
| hsa-miR-126-5p  | -                   | -          | -1.71 (3)  | -1.71            |
| hsa-miR-128-3p  | 2.17 (57)           | 0.57 (43)  | 0.35 (10)  | 1.38             |
| hsa-miR-133a-3p | -                   | -1.44 (43) | 1.05 (3)   | -1.28            |
| hsa-miR-135a-5p | -                   | 0.51 (59)  | 0.12 (3)   | 0.49             |
| hsa-miR-135b-5p | -                   | -0.28 (16) | 1.47 (3)   | 0.00             |
| hsa-miR-141-3p  | -3.30 (82)          | -0.83 (43) | -4.00 (3)  | -2.49            |
| hsa-miR-143-3p  | -2.09 (57)          | 0.46 (16)  | -1.70 (3)  | -1.54            |
| hsa-miR-145-5p  | -1.89 (57)          | -          | -1.01 (3)  | -1.85            |
| hsa-miR-146a-5p | -2.17 (57)          | -          | -0.92 (3)  | -2.11            |
| hsa-miR-146b-5p | -                   | 0.75 (16)  | 0.59 (3)   | 0.72             |
| hsa-miR-148a-3p | -1.66 (57)          | 1.12 (16)  | -0.91 (3)  | -1.05            |
| hsa-miR-15a-5p  | -0.68 (57)          | -          | -0.49 (3)  | -0.67            |
| hsa-miR-15b-5p  | 1.36 (57)           | 1.45 (16)  | -0.40 (3)  | 1.31             |
| hsa-miR-16-5p   | -                   | -          | 0.08 (3)   | 0.08             |
| hsa-miR-17-5p   | 1.67 (77)           | -0.73 (59) | 0.47 (3)   | 0.63             |
| hsa-miR-17-3p   | 1.40 (77)           | -0.23 (59) | 0.98 (3)   | 0.70             |
| hsa-miR-181a-5p | 1.38 (77)           | -          | 1.17 (3)   | 1.37             |
| hsa-miR-181b-5p | 2.22 (77)           | -          | 1.27 (3)   | 2.18             |
| hsa-miR-182-5p  | 4.62 (57)           | -          | 2.32 (3)   | 4.51             |
| hsa-miR-183-5p  | 4.82 (57)           | 0.58 (16)  | 1.68 (3)   | 3.80             |
| hsa-miR-184     | -2.08 (62)          | 1.15 (59)  | -5.24 (17) | -1.09            |
| hsa-miR-194-5p  | -5.37 (139)         | 0.53 (59)  | -4.45 (17) | -3.68            |
| hsa-miR-195-5p  | -2.21 (57)          | -          | -0.40 (3)  | -2.12            |
| hsa-miR-196a-5p | -                   | -          | 1.97 (3)   | 1.97             |
| hsa-miR-19b-3p  | 1.19 (20)           | 0.62 (43)  | 0.22 (3)   | 0.77             |
| hsa-miR-200b-3p | -4.07 (119)         | -          | -3.73 (3)  | -4.06            |
| hsa-miR-200c-3p | -3.11 (119)         | 0.38 (16)  | -3.56 (3)  | -2.72            |
| hsa-miR-203a-3p | -                   | -          | -3.67 (17) | -3.67            |
| hsa-miR-205-5p  | -                   | -          | 1.67 (2)   | 1.67             |
| hsa-miR-20a-5p  | 1.42 (77)           | -1.45 (59) | 0.18 (3)   | 0.18             |
| hsa-miR-20b-5p  | 1.48 (57)           | -1.18 (59) | -0.42 (3)  | 0.11             |
| hsa-miR-21-5p   | -1.98 (57)          | -          | -0.91 (3)  | -1.93            |
| hsa-miR-218-5p  | 1.25 (57)           | -          | 0.56 (3)   | 1.22             |
| hsa-miR-22-3p   | -3.31 (77)          | -          | -2.13 (3)  | -3.26            |
| hsa-miR-221-3p  | -                   | -0.95 (43) | -0.40 (3)  | -0.91            |
| hsa-miR-222-3p  | -                   | -0.76 (43) | -0.25 (3)  | -0.73            |

|                 |             |            |           |       |
|-----------------|-------------|------------|-----------|-------|
| hsa-miR-223-3p  | -           | 1.56 (16)  | -0.38 (3) | 1.25  |
| hsa-miR-224-5p  | 1.58 (57)   | 2.42 (43)  | 0.28 (3)  | 1.89  |
| hsa-miR-23b-3p  | -0.84 (57)  | 0.59 (43)  | 0.02 (3)  | -0.22 |
| hsa-miR-24-3p   | -           | -          | -0.27 (3) | -0.27 |
| hsa-miR-25-3p   | 2.45 (77)   | 1.51 (16)  | 1.70 (3)  | 2.27  |
| hsa-miR-26a-5p  | -1.02 (57)  | -          | 5.66 (3)  | -0.69 |
| hsa-miR-26b-5p  | -0.87 (57)  | -0.87 (59) | -0.60 (3) | -0.86 |
| hsa-miR-27a-3p  | -1.55 (57)  | -0.75 (43) | -0.58 (3) | -1.19 |
| hsa-miR-27b-3p  | -1.27 (57)  | -          | -0.35 (3) | -1.22 |
| hsa-miR-296-5p  | -           | 1.00 (43)  | 1.30 (3)  | 1.02  |
| hsa-miR-29b-3p  | -5.31 (77)  | 0.51 (16)  | -3.51 (3) | -4.28 |
| hsa-miR-30c-5p  | -2.72 (139) | 1.00 (43)  | -1.65 (3) | -1.84 |
| hsa-miR-31-5p   | -2.23 (57)  | -          | -1.18 (3) | -2.18 |
| hsa-miR-3163    | -           | -          | 0.47 (2)  | 0.47  |
| hsa-miR-32-5p   | -           | -1.33 (43) | -0.34 (3) | -1.27 |
| hsa-miR-330-3p  | 1.01 (57)   | 0.40 (16)  | 0.50 (3)  | 0.86  |
| hsa-miR-331-3p  | 0.50 (57)   | -          | -0.74 (3) | 0.44  |
| hsa-miR-34a-5p  | -           | 0.48 (16)  | 1.03 (3)  | 0.57  |
| hsa-miR-34b-3p  | -           | -          | -1.37 (3) | -1.37 |
| hsa-miR-34c-5p  | -           | -0.94 (43) | 1.29 (9)  | -0.55 |
| hsa-miR-361-5p  | 0.59 (57)   | 0.76 (59)  | 0.67 (3)  | 0.68  |
| hsa-miR-365a-3p | -1.39 (57)  | -          | -0.94 (3) | -1.37 |
| hsa-miR-374b-5p | -           | -1.33 (43) | 0.06 (3)  | -1.24 |
| hsa-miR-375     | -           | -          | -0.07 (3) | -0.07 |
| hsa-miR-425-5p  | 0.66 (57)   | -          | 0.09 (3)  | 0.63  |
| hsa-miR-449a    | -           | 1.16 (43)  | 0.75 (2)  | 1.14  |
| hsa-miR-455-5p  | -2.01 (57)  | 0.91 (43)  | -1.34 (3) | -0.77 |
| hsa-miR-494-3p  | -           | 1.01 (59)  | -0.54 (3) | 0.94  |
| hsa-miR-616-3p  | -           | -          | 1.06 (3)  | 1.06  |
| hsa-miR-7-5p    | -           | -          | -0.79 (3) | -0.79 |
| hsa-miR-9-3p    | -           | -          | -1.74 (3) | -1.74 |
| hsa-miR-92a-3p  | 1.68 (77)   | -0.66 (43) | 0.56 (3)  | 0.83  |
| hsa-miR-93-5p   | 2.52 (77)   | -0.76 (59) | 0.33 (2)  | 1.08  |
| hsa-miR-96-5p   | -           | -1.71 (43) | 0.37 (2)  | -1.62 |
| hsa-miR-99a-5p  | -           | -          | -0.50 (3) | -0.50 |
| hsa-miR-99b-5p  | 1.47 (57)   | 0.68 (59)  | 0.30 (3)  | 1.05  |

**Table S3.** A comparison of log<sub>2</sub>FC expression values in DHPLN and WT FFPE samples (samples of other types are not included). miRNAs with WT sample sizes of 3 or lower (shown in Table S2) were excluded. To obtain *p* values, t-tests for independent samples were performed.

| miRNA           | DHPLN mean (sample size) | WT mean (sample size) | WT - DHPLN | <i>p</i> value |
|-----------------|--------------------------|-----------------------|------------|----------------|
| hsa-miR-128-3p  | 0.02 (4)                 | 0.35 (10)             | 0.33       | 0.8157         |
| hsa-miR-184     | -4.74 (4)                | -5.24 (17)            | -0.5       | 0.7719         |
| hsa-miR-194-5p  | -5.04 (4)                | -4.45 (17)            | 0.59       | 0.637          |
| hsa-miR-203a-3p | -4.17 (4)                | -3.67 (17)            | 0.5        | 0.7117         |
| hsa-miR-34c-5p  | -2.28 (3)                | 1.29 (9)              | 3.57       | 0.2105         |

**Table S4.** Log<sub>2</sub>FC values from a single WT sample (Patient 1). also included as one of the FFPE samples in Table S2.

| miRNA           | WT-log <sub>2</sub> FC |
|-----------------|------------------------|
| hsa-let-7a-5p   | 0.01                   |
| hsa-let-7b-5p   | 0.25                   |
| hsa-let-7c-5p   | -0.6                   |
| hsa-let-7f-5p   | -0.4                   |
| hsa-miR-100-5p  | 0.34                   |
| hsa-miR-101-3p  | 0.02                   |
| hsa-miR-106b-5p | 1.21                   |
| hsa-miR-125a-5p | 1.05                   |
| hsa-miR-125b-5p | -0.37                  |
| hsa-miR-126-3p  | -0.97                  |
| hsa-miR-126-5p  | -1.4                   |
| hsa-miR-128-3p  | 0.2                    |
| hsa-miR-133a-3p | -3.19                  |
| hsa-miR-135a-5p | 1.41                   |
| hsa-miR-135b-5p | 3.24                   |
| hsa-miR-141-3p  | -4.35                  |
| hsa-miR-143-3p  | -3.16                  |
| hsa-miR-145-5p  | -1.05                  |
| hsa-miR-146a-5p | -0.43                  |
| hsa-miR-146b-5p | 1.92                   |
| hsa-miR-148a-3p | -2.81                  |
| hsa-miR-15a-5p  | -0.81                  |
| hsa-miR-15b-5p  | -1.85                  |
| hsa-miR-16-5p   | 1.27                   |
| hsa-miR-17-5p   | 1.09                   |
| hsa-miR-17-3p   | 1.48                   |
| hsa-miR-181a-5p | 1.23                   |
| hsa-miR-181b-5p | 1.86                   |
| hsa-miR-182-5p  | 2.81                   |
| hsa-miR-183-5p  | 2.06                   |
| hsa-miR-184     | 0.42                   |
| hsa-miR-194-5p  | -1.43                  |
| hsa-miR-195-5p  | 0.57                   |
| hsa-miR-196a-5p | 3                      |
| hsa-miR-19b-3p  | 0.68                   |
| hsa-miR-200b-3p | -3.21                  |
| hsa-miR-200c-3p | -3.66                  |
| hsa-miR-203a-3p | -4.79                  |
| hsa-miR-205-5p  | N/A                    |
| hsa-miR-20a-5p  | 1.18                   |
| hsa-miR-20b-5p  | -0.07                  |
| hsa-miR-21-5p   | -0.99                  |
| hsa-miR-218-5p  | 0.74                   |
| hsa-miR-22-3p   | -2.69                  |
| hsa-miR-221-3p  | 0.79                   |
| hsa-miR-222-3p  | 1.45                   |

|                 |       |
|-----------------|-------|
| hsa-miR-223-3p  | 0.25  |
| hsa-miR-224-5p  | -0.24 |
| hsa-miR-23b-3p  | 1.56  |
| hsa-miR-24-3p   | 0.35  |
| hsa-miR-25-3p   | 3.62  |
| hsa-miR-26a-5p  | -0.02 |
| hsa-miR-26b-5p  | -0.4  |
| hsa-miR-27a-3p  | 0.31  |
| hsa-miR-27b-3p  | 1.13  |
| hsa-miR-296-5p  | -0.1  |
| hsa-miR-29b-3p  | -4.12 |
| hsa-miR-30c-5p  | 0     |
| hsa-miR-31-5p   | -0.07 |
| hsa-miR-3163    | N/A   |
| hsa-miR-32-5p   | 0.76  |
| hsa-miR-330-3p  | 1.38  |
| hsa-miR-331-3p  | -1.86 |
| hsa-miR-34a-5p  | 0.78  |
| hsa-miR-34b-3p  | -0.81 |
| hsa-miR-34c-5p  | N/A   |
| hsa-miR-361-5p  | 1.64  |
| hsa-miR-365a-3p | -1.69 |
| hsa-miR-3662    | N/A   |
| hsa-miR-3666    | N/A   |
| hsa-miR-374b-5p | 1.59  |
| hsa-miR-375     | 1.22  |
| hsa-miR-425-5p  | 0.49  |
| hsa-miR-449a    | N/A   |
| hsa-miR-455-5p  | -1.64 |
| hsa-miR-494-3p  | -1.59 |
| hsa-miR-616-3p  | 1.65  |
| hsa-miR-7-5p    | -1.82 |
| hsa-miR-9-3p    | -1.26 |
| hsa-miR-92a-3p  | 1.36  |
| hsa-miR-93-5p   | 2.21  |
| hsa-miR-96-5p   | 0.71  |
| hsa-miR-99a-5p  | -1.12 |
| hsa-miR-99b-5p  | 1.78  |

---
